# Supplementary material for: Iberian pig adaptation to acorn consumption: II. Net portal appearance of amino acids
Source: PeerJ. 2018 Dec 18;6:e6137. doi: 10.7717/peerj.6137 (PMC6302897; doi:10.7717/peerj.6137)
Supplement: Supplemental Information 1 [file peerj-06-6137-s001.xls]

## Sheet: Glucosa y AAs
Pig ID	Period (1=no adaptation; 2=1 wk adaptation)	hour of sampling	TIEMPO	Portal Plasma flow, ml/min	[Val]artery, mM	[Val]portal, mM	[Portal-Arterial]Val, mM	NPA Val, µM/min	[TRP]artery, mM	[TRP]portal, mM	[Portal-Arterial]TRP, mM	NPA TRP, µM/min	[thr]artery, mM	[thr]portal, mM	[Portal-Arterial]thr, mM	NPA thr, µM/min	[Phe]artery, mM	[Phe]portal, mM	[Portal-Arterial]Phe, mM	NPA Phe, µM/min	[Met]artery, mM	[Met]portal, mM	[Portal-Arterial]Met, mM	NPA Met, µM/min	[Lys]artery, mM	[Lys]portal, mM	[Portal-Arterial]Lys, mM	NPA Lys, µM/min	[Leu]artery, mM	[Leu]portal, mM	[Portal-Arterial]Leu, mM	NPA Leu, µM/min	[Ile]artery, mM	[Ile]portal, mM	[Portal-Arterial]Ile, mM	NPA Ile, µM/min	[His]artery, mM	[His]portal, mM	[Portal-Arterial]His, mM	NPA His, µM/min	[Arg]artery, mM	[Arg]portal, mM	[Portal-Arterial]Arg, mM	NPA Arg, µM/min	[Tyr]artery, mM	[Tyr]portal, mM	[Portal-Arterial]Tyr, mM	NPA Tyr, µM/min	[Tau]artery, mM
Agapita1	1	0	0		0.2585		-0.0075	-2.89302	0.0217		-0.0013	-0.506235	0.1951		0.1289	49.8479	0.0416		0.0004	0.139924	0.0097		-0.0029	-1.10404	0.0898		0.005	1.91542	0.0702		0.0034	1.31157	0.1228		-0.0052	-2.00908	0.021		-0.0007	-0.258121	0.0425		0.0136	5.26345	0.0284		0.0011	0.417943	0.0507
Agapita1	1	0.5	0.5		0.3103		0.0077	7.36075	0.0375		0.0006	0.529826	0.2394		0.1158	110.186	0.0644		0.0164	15.6447	0.0068		0.0019	1.81434	0.1064		0.0246	23.4051	0.0829		0.0268	25.4639	0.1316		0.0226	21.4756	0.0322		0.0096	9.10791	0.0613		0.0107	10.2106	0.0535		0.0133	12.6454	0.0625
Agapita1	1	1	1		0.2629		0.0123	11.1668	0.0337		0.0051	4.59245	0.2402		0.1395	126.176	0.057		0.0084	7.57077	0.0074		0.0009	0.846378	0.0867		0.0086	7.81574	0.0631		0.0145	13.0927	0.106		0.0096	8.65823	0.0254		0.0057	5.16908	0.0393		-0.0199	-17.9854	0.0438		0.0075	6.81343	0.0524
Agapita1	1	1.5	1.5		0.2595		0.0231	10.7014	0.0476		-0.0055	-2.53946	0.2265		0.1753	81.302	0.0575		0.0139	6.42425	0.0057		0.0033	1.51254	0.0876		0.0179	8.28198	0.0628		0.0176	8.15955	0.1028		0.0167	7.75682	0.0265		0.0059	2.7173	0.0459		-0.028	-12.9664	0.0438		0.012	5.56805	0.0503
Agapita1	1	2	2		0.2311		0.023	10.9996	0.0424		-0.005	-2.39295	0.226		0.1777	84.8106	0.0524		0.0104	4.96892	0.0074		0.0006	0.270958	0.0706		0.029	13.8272	0.0582		0.0144	6.86649	0.0931		0.008	3.80464	0.0213		0.0062	2.96174	0.0107		0.0133	6.34583	0.0376		0.013	6.19619	0.0563
Agapita1	1	2.5	2.5		0.2407		-0.0071	-3.31698	0.0399		-0.0046	-2.14156	0.2523		0.1956	91.3413	0.0534		0.0031	1.45701	0.0107		-0.006	-2.78188	0.0746		0.0032	1.48671	0.0603		0.0108	5.03329	0.0999		-0.0011	-0.522899	0.0228		0.001	0.444403	0.0258			52.9305	0.0383		0.0039	1.82097	0.0515
Agapita1	1	3	3		0.2287		0.0091	4.93105	0.0421		-0.0251	-13.6292	0.2325		0.1636	88.6809	0.051		0.0083	4.52291	0.0053		0.003	1.63828	0.0656		0.0105	5.68434	0.0587		0.0122	6.61674	0.0941		0.0054	2.95259	0.0198		0.0038	2.06429	0.015		0.0066	3.57432	0.0362		0.0074	4.00222	0.0501
Agapita1	1	3.5	3.5		0.2351		-0.0037	-1.88894	0.042		-0.0031	-1.56473	0.2485		0.1578	80.772	0.0522		0.0027	1.40487	0.0071		-0.0017	-0.881042	0.0658		0.004	2.05565	0.0633		0.0048	2.47624	0.1027		-0.0045	-2.28378	0.0193		0.0032	1.62769	0.0096		0.005	2.58146	0.0367		0.0027	1.36141	0.0446
Agapita1	1	4	4		0.2541		-0.0085	-2.50126	0.0435		-0.0017	-0.484903	0.2911		0.0188	5.5338	0.0554		0.0023	0.672547	0.0089		0.001	0.30059	0.0785		0.0001	0.0305268	0.0727		0.0018	0.530537	0.1139		0.0026	0.770539	0.0232		0.0004	0.116419	0.022		0.0104	3.04886	0.0427		0.0019	0.565908	0.0477
Agapita1	1	5	5		0.2573		-0.0139	-4.59078	0.0409		-0.0142	-4.66602	0.2826		0.0426	14.0356	0.0548		-0.0003	-0.111708	0.0095		-0.0035	-1.14996	0.0796		0.0026	0.845134	0.0773		0.0025	0.833542	0.1224		-0.0031	-1.02319	0.0223		-0.0018	-0.597408	0.0276		-0.0018	-0.59432	0.0448		0.0005	0.170063	0.0491
Agapita1	1	6	6		0.2701		-0.0047	-2.25554	0.0428		-0.0121	-5.77796	0.2894		0.0368	17.562	0.0579		0.0017	0.811904	0.0121		-0.0018	-0.853316	0.092		0.0043	2.03502	0.0888		0.002	0.962227	0.1329		0.0033	1.55226	0.0256		-0.0021	-1.01094	0.0402		-0.0239	-11.371	0.0548		-0.001	-0.466956	0.0459
Agapita1	1	0	0	386.757		0.251				0.0204				0.324				0.0419				0.0069				0.0948				0.0736				0.1176				0.0203				0.0561				0.0295
Agapita1	1	0.5	0.5	951.609		0.318				0.038				0.3552				0.0809				0.0088				0.131				0.1097				0.1541				0.0417				0.072				0.0667
Agapita1	1	1	1	904.691		0.2752				0.0388				0.3797				0.0654				0.0084				0.0953				0.0776				0.1156				0.0311				0.0194				0.0514
Agapita1	1	1.5	1.5	463.783		0.2826				0.0421				0.4018				0.0713				0.009				0.1054				0.0804				0.1195				0.0323				0.0179				0.0558
Agapita1	1	2	2	477.222		0.2541				0.0374				0.4037				0.0628				0.008				0.0996				0.0726				0.1011				0.0275				0.024				0.0506
Agapita1	1	2.5	2.5	466.912		0.2336				0.0354				0.4479				0.0565				0.0048				0.0778				0.0711				0.0988				0.0237				0.1392				0.0422
Agapita1	1	3	3	542.083		0.2378				0.0169				0.3961				0.0593				0.0083				0.0761				0.0709				0.0996				0.0236				0.0216				0.0436
Agapita1	1	3.5	3.5	511.789		0.2314				0.0389				0.4063				0.0549				0.0053				0.0699				0.0681				0.0982				0.0225				0.0146				0.0393
Agapita1	1	4	4	293.589		0.2456				0.0419				0.31				0.0577				0.0099				0.0786				0.0745				0.1165				0.0236				0.0324				0.0446
Agapita1	1	5	5	329.522		0.2434				0.0267				0.3252				0.0544				0.006				0.0822				0.0798				0.1193				0.0205				0.0258				0.0453
Agapita1	1	6	6	476.632		0.2654				0.0307				0.3262				0.0596				0.0103				0.0963				0.0908				0.1361				0.0235				0.0164				0.0539
Isabel1	1	0	0		0.3235		0.0016	0.666657	0.0354		-0.0087	-3.59367	0.226		0.0726	29.8327	0.0522		0.0026	1.06664	0.0107		-0.0044	-1.80634	0.1082		0.0081	3.33697	0.1557		0.0081	3.32176	0.1234		-0.0016	-0.642119	0.0277		0.0014	0.558781	0.0853		-0.0166	-6.82722	0.0392		0.0001	0.0604016	0.0765
Isabel1	1	0.5	0.5		0.3011		0.0407	49.4908	0.0495		-0.0028	-3.41145	0.2211		0.1386	168.323	0.0614		0.0129	15.6381	0.0103		0.0007	0.856296	0.1136		0.0245	29.7462	0.128				0.1031		0.0167	20.2925	0.0302		0.0041	4.94667	0.1222		0.0268	32.5486	0.0562		0.011	13.3741	0.0704
Isabel1	1	1	1		0.3002		0.0434	32.3927	0.0551		0.0075	5.62085	0.2305		0.1297	96.8114	0.0621		0.0149	11.1518	0.0088		0.0044	3.2491	0.1099		0.0486	36.281	0.1173		0.0269	20.0882	0.0992		0.0169	12.6242	0.0301		0.0087	6.50245	0.1156				0.0561		0.017	12.7023	0.0757
Isabel1	1	1.5	1.5		0.3224		0.0781	45.5273	0.0601		0.0123	7.16621	0.2649		0.1163	67.7637	0.0715		0.0226	13.1918	0.0122		0.0006	0.346479	0.1474		0.011	6.38545	0.1352			29.4933	0.1119		0.0301	17.5468	0.0356		0.0084	4.91458			-0.054	-31.4557	0.0684		0.0177	10.2935	0.0875
Isabel1	1	2	2		0.2899		0.0125	6.64327	0.0435		0.0044	2.35608	0.2364		0.092	49.014	0.0631		0.0096	5.13801	0.0075		0.004	2.12443	0.0978		0.0462	24.6185	0.1183		0.0218	11.6033	0.0985		0.0097	5.16965	0.0285		0.0067	3.55566	0.0944			72.9112	0.0553		0.0151	8.04114	0.0718
Isabel1	1	2.5	2.5		0.2943		0.027	11.2861	0.0375		0.0237	9.93348	0.2787		0.0746	31.2262	0.0653		0.0123	5.13432	0.0105		-0.0012	-0.51648	0.1273		-0.0035	-1.44791	0.1257		0.0237	9.92698	0.1006		0.0146	6.11352	0.0355		0.0009	0.375392			-0.111	-46.4704	0.0667		0.0006	0.270531	0.0727
Isabel1	1	3	3		0.3742		-0.0465	-20.513	0.0471		0.012	5.29927	0.129		0.2543	112.258	0.0859		-0.0046	-2.04638	0.0181		-0.0002	-0.0965856	0.1908		-0.0348	-15.3408	0.1636		0.0051	2.24353	0.1397		-0.0159	-7.02575	0.0386		0.002	0.870646			-0.0229	-10.1294	0.0956		-0.0131	-5.80009	0.0483
Isabel1	1	3.5	3.5		0.3157		-0.0189	-11.3039	0.0577		-0.0161	-9.63642	0.2598		0.0838	50.2315	0.0769		-0.0003	-0.201997	0.0162		-0.0069	-4.15412	0.1343		0.0001	0.0730747	0.1643		0.0038	2.26476	0.1214		-0.0072	-4.30756	0.0332		-0.0005	-0.314073			-0.056	-33.5752	0.0771		0.0005	0.312993	0.0517
Isabel1	1	4	4		0.2782		0.0055	2.84933	0.0504		-0.0077	-3.93402	0.2429		0.1025	52.6456	0.0656		0.0034	1.7578	0.0125		-0.0005	-0.2631	0.1204		0.0116	5.97164	0.1371		0.0047	2.3901	0.1002		0	-0.0208184	0.0269		0.006	3.09432			0.006	3.07792	0.065		0.0028	1.42983	0.0487
Isabel1	1	5	5		0.337		-0.0198	-13.1238	0.0598		-0.016	-10.6439	0.3074		0.0501	33.2798	0.0803		-0.0006	-0.423706	0.0178		-0.0057	-3.76977	0.1525		-0.024	-15.9319	0.176		0.0006	0.417677	0.1285		-0.0082	-5.4307	0.0374		-0.0005	-0.356675			-0.0998	-66.2734	0.0782		-0.0049	-3.28167	0.0633
Isabel1	1	6	6		0.3728		-0.0525	-36.0471	0.063		-0.0225	-15.4427	0.3372		-0.1388	-95.1914	0.0912		-0.0158	-10.8303	0.0224		-0.0065	-4.48609	0.1716		-0.0432	-29.6563	0.204				0.1459		-0.0136	-9.3597	0.0418		-0.0087	-5.95301			-0.0938	-64.3465	0.0842		-0.0192	-13.1605	0.0818
Isabel1	1	0	0	411.106		0.3251				0.0267				0.2986				0.0548								0.1163				0.1638				0.1219				0.029				0.0687				0.0394
Isabel1	1	0.5	0.5	1214.53		0.3418				0.0467				0.3597				0.0742								0.1381				0.1738				0.1198				0.0343				0.149				0.0673
Isabel1	1	1	1	746.441		0.3436				0.0626				0.3602				0.077								0.1585				0.1443				0.1161				0.0389								0.0731
Isabel1	1	1.5	1.5	582.669		0.4005								0.3811				0.0942								0.1584				0.1858				0.142				0.0441				0.1655				0.0861
Isabel1	1	2	2	532.971		0.3024				0.0479				0.3284				0.0727								0.144				0.1401				0.1082				0.0352								0.0704
Isabel1	1	2.5	2.5	418.677		0.3213				0.0612				0.3533				0.0775								0.1238				0.1494				0.1152				0.0364				0.1127				0.0673
Isabel1	1	3	3	441.368		0.3277				0.0591				0.3833				0.0812								0.156				0.1686				0.1238				0.0406								0.0824
Isabel1	1	3.5	3.5	599.297		0.2969				0.0416				0.3437				0.0765								0.1344				0.168				0.1142				0.0326				0.1359				0.0776
Isabel1	1	4	4	513.55		0.2838				0.0428				0.3454				0.0691								0.132				0.1418				0.1001				0.033								0.0678
Isabel1	1	5	5	664.121		0.3173				0.0438				0.3576				0.0797								0.1285				0.1766				0.1203				0.0368				0.1102				0.0732
Isabel1	1	6	6	686.01		0.3202				0.0404				0.1985				0.0754								0.1284				0.1701				0.1323				0.0331				0.1024				0.065
Delfina1	1	0	0		0.3248		-0.0132	-7.58587	0.0292		-0.0073	-4.18453	0.3707		0.1033	59.3587	0.0661		0.0015	0.858954	0.0264		-0.0011	-0.653559	0.2101		0.0052	2.98682	0.1023		-0.0018	-1.05869	0.145		-0.0164	-9.4461	0.0575		0.0055	3.16976	0.1064		-0.0192	-11.002	0.0745		0.0014	0.793036	0.0337
Delfina1	1	0.5	0.5		0.3507		0.0218	16.35	0.0309		0.0027	2.0569	0.3761		0.1838	137.75	0.0797		0.0152	11.381	0.0274		-0.0027	-2.00202	0.2393		0.0368	27.5501	0.1165		0.015	11.2621	0.1483		0.0005	0.40588	0.0636		0.008	5.98083	0.1319		-0.0794	-59.4734	0.0889		0.0119	8.91703	0.0339
Delfina1	1	1	1		0.3318		0.0039	2.84844	0.0287		0.0066	4.87135	0.3914		0.1406	103.558	0.071		0.0064	4.72337	0.0232		-0.0046	-3.36058	0.2287		0.0154	11.3569	0.1007		0.0063	4.60453	0.1329		-0.0113	-8.29391	0.06		0.0054	3.9576	0.0858		-0.0554	-40.7723	0.0812		0.0047	3.43663	0.0362
Delfina1	1	1.5	1.5		0.3089		0.0222	16.1733	0.027		0.002	1.45463	0.3697		0.1314	95.4932	0.0661		0.0097	7.01882	0.019		-0.001	-0.724909	0.1952		0.0233	16.9397	0.0931		0.0074	5.38749	0.1248		-0.0067	-4.87935	0.0552		0.0079	5.76938	0.0635		0.0046	3.33405	0.0742		0.0085	6.16506	0.0394
Delfina1	1	2	2		0.3127		-0.0431	-32.4097	0.0336		-0.0065	-4.86762	0.4016		0.2085	156.655	0.0612		-0.0031	-2.36104	0.0194		-0.0077	-5.81809	0.1899		0.0035	2.60066	0.0865		0.0053	3.9984	0.1203		-0.0132	-9.94936	0.0517		-0.0071	-5.32322	0.0498		0.0352	26.4759	0.0691		-0.0019	-1.39676	0.0379
Delfina1	1	2.5	2.5		0.3061		0.0173	13.506	0.0343		-0.0034	-2.65704	0.3722		0.1732	135.179	0.0629		0.011	8.54908	0.0202		-0.0012	-0.970649	0.1771		0.0185	14.4393	0.0912		0.0049	3.84125	0.1205		-0.0062	-4.86478	0.0487		0.0109	8.47727	0.0539		0.0536	41.827	0.0687		0.0086	6.70909	0.0347
Delfina1	1	3	3		0.3083		0.0053	3.78131	0.0382		-0.0005	-0.39394	0.3812		0.1628	116.881	0.0647		0.007	4.99265	0.0208		-0.003	-2.14914	0.1765		0.023	16.4764	0.093		0.0044	3.18797	0.1213		-0.0078	-5.60041	0.0465		0.0085	6.07413	0.0949		-0.0185	-13.3134	0.0683		0.0064	4.62225	0.031
Delfina1	1	3.5	3.5		0.308		0.0052	4.32814	0.0386		-0.0062	-5.15418	0.4076		0.1423	118.697	0.0626		0.005	4.19926	0.0211		-0.0049	-4.11775	0.1764		0.0077	6.42504	0.0927		-0.0001	-0.066306	0.1204		-0.0084	-6.9884	0.0454		0.0064	5.30763	0.0698		-0.0325	-27.1277	0.0642		0.0012	1.00507	0.0304
Delfina1	1	4	4		0.3429		0.0014	1.605	0.0342		0.0037	4.18923	0.4696		0.1343	150.677	0.0737		0.0069	7.69145	0.0233		-0.0069	-7.69723	0.2269		0.0022	2.47193	0.1112		0.0003	0.313518	0.1357		-0.0106	-11.9026	0.0496		0.0055	6.14643	0.0885		-0.0714	-80.138	0.0744		0.0011	1.27757	0.0303
Delfina1	1	5	5		0.3347		-0.0365	-15.7001	0.0383		-0.0002	-0.0799164	0.4737		0.1555	66.9595	0.0698		-0.0013	-0.578265	0.0197		-0.0079	-3.38815	0.2225		-0.011	-4.75179	0.1077		0	0.0197723	0.1272		-0.0195	-8.40632	0.0479		-0.0043	-1.83644	0.0618		-0.0206	-8.88137	0.068		-0.0079	-3.39033	0.0318
Delfina1	1	6	6		0.3806		-0.0063	-3.96074	0.0516		-0.016	-10.0385	0.5166				0.0826		-0.0037	-2.33846	0.029		-0.0052	-3.23368	0.2901		-0.0282	-17.716	0.1381		-0.0104	-6.53362	0.1543		0.0202	12.7034	0.0534		-0.0031	-1.95481	0.0795		0.0131	8.20857	0.0807		-0.0045	-2.8343	0.0356
Delfina1	1	0	0	574.419		0.3116				0.022				0.4741				0.0676				0.0252				0.2153				0.1005				0.1285				0.063				0.0873				0.0759
Delfina1	1	0.5	0.5	749.28		0.3725				0.0337				0.56				0.0949				0.0248				0.276				0.1315				0.1488				0.0716				0.0525				0.1008
Delfina1	1	1	1	736.627		0.3357				0.0353				0.532				0.0774				0.0186				0.2441				0.1069				0.1217				0.0654				0.0305				0.0859
Delfina1	1	1.5	1.5	726.917		0.3311				0.029				0.501				0.0757				0.018				0.2185				0.1005				0.118				0.0631				0.0681				0.0827
Delfina1	1	2	2	751.224		0.2695				0.0271				0.6102				0.058				0.0117				0.1934				0.0919				0.1071				0.0446				0.085				0.0673
Delfina1	1	2.5	2.5	780.581		0.3234				0.0309				0.5454				0.0738				0.0189				0.1956				0.0961				0.1143				0.0596				0.1075				0.0773
Delfina1	1	3	3	717.873		0.3135				0.0376				0.544				0.0717				0.0178				0.1994				0.0974				0.1135				0.055				0.0764				0.0748
Delfina1	1	3.5	3.5	834.412		0.3132				0.0324				0.5499				0.0677				0.0162				0.1841				0.0926				0.112				0.0517				0.0373				0.0654
Delfina1	1	4	4	1121.82		0.3443				0.0379				0.6039				0.0806				0.0164				0.2291				0.1115				0.1251				0.0551				0.0171				0.0755
Delfina1	1	5	5	430.515		0.2982				0.0381				0.6292				0.0685				0.0118				0.2115				0.1077				0.1076				0.0436				0.0411				0.0601
Delfina1	1	6	6	627.482		0.3743				0.0356				0.2782				0.0789				0.0238				0.2618				0.1277				0.1745				0.0503				0.0925				0.0761
Jerónima1*	1	0	0		0.3472		-0.0728	-34.0759	0.0294		-0.0131	-6.15452	0.2088		0.0696	32.5959	0.0544		-0.0123	-5.74512	0.0133		0.0105	4.92403	0.1998		-0.0435	-20.3707	0.103		-0.0136	-6.38647	0.1425		-0.0324	-15.1622	0.0453		-0.01	-4.69659	0.1259		-0.0688	-32.1968	0.0471		-0.0122	-5.69417	0.0347
Jerónima1	1	0.5	0.5				-0.0825	-43.3785	0.0346		-0.0072	-3.76931	0.3142		0.1176	61.8662	0.0793		-0.0079	-4.17736	0.0158		0.0133	6.9801	0.2763		-0.0585	-30.7938	0.1335		-0.0164	-8.64959	0.1733		-0.0331	-17.4223	0.056		-0.0098	-5.13259	0.1493		-0.0942	-49.5689	0.0768		-0.0114	-5.98152	0.0509
Jerónima1	1	1	1		0.3755		-0.0597	-37.4684	0.0285		-0.0118	-7.40211	0.3926		-0.0094	-5.92413	0.0646		-0.0107	-6.71724	0.012		0.014	8.79909	0.2348		-0.0597	-37.4427	0.1014		-0.0017	-1.04784	0.1399		-0.02	-12.5356	0.0461		-0.0107	-6.70205	0.0674		-0.0001	-0.0463819	0.0637		-0.014	-8.80375	0.0403
Jerónima1	1	1.5	1.5		0.2805		0.0266	14.7022	0.0137		0.0044	2.44334	0.1706		0.2212	122.107	0.0458		0.0108	5.94861	0.0234		-0.0025	-1.39364	0.1492		0.0243	13.435	0.0881		0.0023	1.25332	0.1115		0.0023	1.29229	0.0304		0.004	2.20117	0.0728		-0.0239	-13.2156	0.0404		0.0136	7.49158	0.0285
Jerónima1	1	2	2		0.2757		0.0034	1.86236	0.0164		-0.0061	-3.34184	0.2236		0.1629	89.4796	0.043		0.0069	3.78049	0.0198		-0.0043	-2.35986	0.1259		0.0248	13.622	0.0765		0.0014	0.790187	0.1001		-0.0006	-0.347388	0.0234		0.0059	3.23174	0.0635		-0.0118	-6.46137	0.0375		0.0072	3.97129	0.0283
Jerónima1	1	2.5	2.5		0.3045		-0.0156	-10.5602	0.0145		0.0009	0.626355	0.2448		0.0841	57.0838	0.0495		0.0041	2.75512	0.018		0.0011	0.750794	0.1428		0.0129	8.78344	0.0831		0.0036	2.41564	0.1129		-0.0027	-1.83132	0.0269		0.0013	0.853016	0.0465		0.088	59.7153	0.0454		0.0037	2.49556	0.031
Jerónima1	1	3	3		0.285		0.0034	1.78435	0.0183		0.0058	3.06658	0.2336				0.0447		0.0108	5.70344	0.0298		-0.0022	-1.16787	0.1158		0.0264	14.0105	0.0904		0.002	1.04433	0.1125		-0.0109	-5.789	0.026		0.0034	1.79884	0.0836		-0.0293	-15.5183	0.0401		0.0125	6.6463	0.0215
Jerónima1	1	3.5	3.5		0.3202		-0.0166	-8.90363	0.0142		0.0039	2.07064	0.3929		0.1564	83.7683	0.0578		0.0018	0.945486	0.0121		-0.0035	-1.8602	0.1669		-0.0022	-1.17891	0.0927		0.0041	2.20789	0.1223		-0.0078	-4.20359	0.0364		0.0012	0.660046	0.0375		-0.0082	-4.37989	0.0531		0.0015	0.787306	0.0372
Jerónima1	1	4	4		0.3191		-0.0307	-16.5259	0.0233		-0.0077	-4.13948	0.3307		0.0608	32.7201	0.0546		-0.0026	-1.37983	0.0081			9.70188	0.1486		-0.0048	-2.6037	0.0982		-0.0074	-3.98357	0.1243		-0.0145	-7.81274	0.0323		-0.0037	-1.96742	0.0602		-0.0208	-11.1675	0.0502		-0.0003	-0.137897	0.027
Jerónima1	1	5	5		0.2676		0.0138	7.76403	0.0169		-0.0062	-3.45411	0.2591		0.1254	70.3177	0.0402		0.0083	4.6318	0.0194		0.0031	1.73311	0.1078		0.0362	20.3027	0.0871		-0.0009	-0.491631	0.105		-0.0039	-2.20833	0.0184		0.0045	2.5406	0.0598		0.0005	0.285831	0.0342		0.013	7.26857	0.0191
Jerónima1	1	6	6		0.3221		-0.0081	-3.81268	0.0167		0.0063	2.95859	0.3557		-0.0521	-24.4495	0.0538		0.0005	0.254952	0.0094		0.0099	4.63187	0.1608		-0.0057	-2.68521	0.0997		-0.0013	-0.606673	0.1277		-0.0011	-0.503246	0.0236		0.0038	1.78221	0.0523		0.0023	1.07226	0.0485		0.002	0.935524	0.0255
Jerónima1	1	0	0	468.1		0.2744				0.0163				0.2784				0.0421				0.0238				0.1563				0.0894				0.1101				0.0353				0.0571				0.0349
Jerónima1	1	0.5	0.5	526.028		0.3653				0.0274				0.4318				0.0714				0.0291				0.2178				0.1171				0.1402				0.0463				0.055				0.0654
Jerónima1	1	1	1	627.69		0.3158				0.0167				0.3832				0.0539				0.026				0.1751				0.0998				0.1199				0.0354				0.0673				0.0496
Jerónima1	1	1.5	1.5	552.116		0.3071				0.0181				0.3918				0.0565				0.0209				0.1735				0.0904				0.1139				0.0344				0.0489				0.054
Jerónima1	1	2	2	549.148		0.2791				0.0103				0.3866				0.0499				0.0155				0.1507				0.078				0.0994				0.0293				0.0517				0.0447
Jerónima1	1	2.5	2.5	678.571		0.289				0.0154				0.3289				0.0536				0.0191				0.1558				0.0866				0.1102				0.0282				0.1345				0.0491
Jerónima1	1	3	3	530.339		0.2883				0.024				0.6881				0.0554				0.0276				0.1422				0.0924				0.1016				0.0294				0.0543				0.0526
Jerónima1	1	3.5	3.5	535.769		0.3036				0.0181				0.5493				0.0596				0.0086				0.1647				0.0968				0.1145				0.0377				0.0294				0.0546
Jerónima1	1	4	4	537.783		0.2884				0.0156				0.3916				0.0521				0.0262				0.1437				0.0908				0.1098				0.0286				0.0394				0.0499
Jerónima1	1	5	5	560.803		0.2814				0.0108				0.3845				0.0485				0.0225				0.144				0.0862				0.1011				0.0229				0.0603				0.0472
Jerónima1	1	6	6	469.57		0.314				0.023				0.3037				0.0544				0.0193				0.1551				0.0984				0.1267				0.0274				0.0546				0.0505
Delfina2	2	0	0		0.3169		0.0419	24.0456	0.0263		-0.0077	-4.43725	0.2695		0.0519	29.8224	0.0468		0.0047	2.68785	0.0242		-0.0159	-9.12668	0.1483		0.0352	20.2151	0.1381		0.0026	1.46855	0.1562		-0.0057	-3.27427	0.0366		0.0135	7.76064	0.1033		-0.067	-38.473	0.0594		-0.0071	-4.06462	0.0549
Delfina2	2	0.5	0.5		0.4068		0.0245	23.6191	0.0344		0.0022	2.07816	0.273		0.1109	106.733	0.0637		0.0132	12.6594	0.0173		0.0019	1.80183	0.2548		0.0291	28.031	0.1807		0.0286	27.474	0.1879		0.007	6.72756	0.0531		0.008	7.73578	0.0965		0.0064	6.12187	0.0672		0.0106	10.1708	0.0676
Delfina2	2	1	1		0.392		0.0127	12.7508	0.0341		0.0042	4.19455	0.3126		0.0611	61.3146	0.0604		0.0108	10.8423	0.0139		0.0031	3.09761	0.2437		0.0118	11.8452	0.1714		0.018	18.0571	0.174		-0.0002	-0.22441	0.0471		0.0074	7.43355	0.0836		0.0121	12.1769	0.0597		0.0102	10.2553	0.0638
Delfina2	2	1.5	1.5		0.3378		-0.0179	-13.2221	0.0298		-0.0004	-0.270936	0.2536		0.152	112.535	0.0519		0.0164	12.1189	0.0108		0.005	3.69291	0.1186		0.0698	51.6411	0.1387				0.1418		0.0179	13.275	0.0381		-0.001	-0.753489	0.0619		0.0309	22.8824	0.0486		0.0143	10.6178	0.0565
Delfina2	2	2	2		0.3118		-0.0401	-28.9703	0.0302		-0.0058	-4.19694	0.2539		0.013	9.37576	0.045		0.0032	2.32913	0.0088		-0.0023	-1.68188	0.1518		0.0151	10.9414	0.1217		0.0078	5.61031	0.128		-0.0064	-4.62166	0.0367		0.0027	1.96213	0.0498		-0.0141	-10.2183	0.0406		-0.0008	-0.60818	0.0588
Delfina2	2	2.5	2.5		0.3047		0.0374	34.7818	0.0175		0.0148	13.7382	0.3091		0.0774	71.9606	0.0702		-0.0055	-5.07347	0.0242		-0.0118	-10.9938	0.1183		0.0383	35.5965	0.1678		0.0119	11.0682	0.1836		-0.0218	-20.2895	0.0311		0.0103	9.59364	0.0896		0.0168	15.6613	0.0695		-0.0078	-7.29309	0.0619
Delfina2	2	3	3		0.3069		0.0164	13.2424	0.0222		-0.0067	-5.4329	0.2769		0.0387	31.2286	0.0439		0.0043	3.42963	0.0067		-0.0016	-1.29233	0.1334		-0.0168	-13.5279	0.1185		0.0065	5.26946	0.1241		-0.0065	-5.2798	0.0354		0.004	3.22173	0.0605		-0.0288	-23.1884	0.0378		0.005	4.04409	0.0496
Delfina2	2	3.5	3.5		0.3461		0.0221	16.6676	0.0311		-0.0089	-6.72224	0.2593		0.1085	81.8952	0.0543		0.0092	6.97157	0.0108		0.0004	0.276829	0.1589		0.0356	26.8435	0.1541		0.0179	13.5221	0.1534		0.0028	2.08643	0.0409		0.0072	5.41832	0.0641		-0.0025	-1.86369	0.0499		0.009	6.80145	0.0577
Delfina2	2	4	4		0.3055		-0.003	-2.14334	0.0322		-0.0202	-14.6652	0.2379		0.1321	95.9133	0.0438		0.0001	0.0778647	0.0076		-0.0017	-1.26705	0.1281		-0.0255	-18.5147	0.1259		-0.002	-1.4802	0.1292		-0.0156	-11.3244	0.0336		0.0023	1.67612	0.0421		-0.0087	-6.32513	0.0375		-0.0004	-0.288797	0.0539
Delfina2	2	5	5		0.3182		0.0156	11.0688	0.0294		-0.0103	-7.31262	0.2506		0.0917	64.9624	0.0495		0.0024	1.7347	0.0087		-0.0008	-0.551237	0.1401		-0.0168	-11.8825	0.1498		0.0006	0.430245	0.142		-0.0059	-4.1474	0.0368		0.0063	4.4777	0.0531		0.0037	2.62922	0.0445		0.0024	1.66822	0.0566
Delfina2	2	6	6		0.3454		0.0222	19.7846	0.0378		-0.0139	-12.3606	0.3004		-0.0105	-9.32498	0.0558		0.0083	7.39607	0.0134		0.0002	0.190682	0.1695		0.0022	2.00181	0.1735		0.0223	19.8944	0.155		0.0375		0.0387		0.0055	4.93694	0.0639		0.002	1.80976	0.0483		0.0075	6.67789	0.0556
Delfina2	2	0	0	574.097		0.3588				0.0185				0.3215				0.0515				0.0083				0.1835				0.1407				0.1505				0.0501				0.0363				0.0524
Delfina2	2	0.5	0.5	962.119		0.4314				0.0365				0.384				0.0769				0.0191				0.2839				0.2092								0.0612				0.1029				0.0777
Delfina2	2	1	1	1004.05		0.4047				0.0383				0.3736				0.0712				0.017				0.2555				0.1894				0.1738				0.0545				0.0957				0.0699
Delfina2	2	1.5	1.5	740.129		0.3199				0.0294				0.4056				0.0683				0.0157				0.1884				0.1879				0.1597				0.0371				0.0928				0.0629
Delfina2	2	2	2	722.646		0.2717				0.0244				0.2669				0.0482				0.0065				0.1669				0.1294				0.1216				0.0394				0.0356				0.0397
Delfina2	2	2.5	2.5	929.867		0.3421				0.0323				0.3865				0.0647				0.0124				0.1566				0.1797				0.1618				0.0414				0.1065				0.0617
Delfina2	2	3	3	806.398		0.3233				0.0155				0.3156				0.0482				0.0051				0.1167				0.125				0.1175				0.0394				0.0318				0.0428
Delfina2	2	3.5	3.5	754.575		0.3681				0.0222				0.3678				0.0636				0.0112				0.1945				0.172				0.1562				0.0481				0.0616				0.0589
Delfina2	2	4	4	725.86		0.3026				0.012				0.37				0.044				0.0059				0.1026				0.1239				0.1136				0.0359				0.0334				0.0371
Delfina2	2	5	5	708.117		0.3339				0.0191				0.3424				0.0519				0.0079				0.1233				0.1504				0.1362				0.0431				0.0568				0.0468
Delfina2	2	6	6	890.536		0.3676				0.024				0.2899				0.0641				0.0136				0.1718				0.1958								0.0443				0.066				0.0558
Jerónima2	2	0	0		0.3163		0.0189	12.3988	0.0234		0.0005	0.301409	0.2498		0.0348	22.8057	0.05		0.0091	5.97488	0.0142		-0.001	-0.650207	0.1659		0.0142	9.30469	0.1546		0.01	6.52405	0.1377		-0.0011	-0.734359	0.0323		0.0064	4.19431	0.0941		-0.0698	-45.7274	0.0534		0.0064	4.16819	0.0701
Jerónima2	2	0.5	0.5		0.3496		0.0176	16.461	0.0284		-0.0022	-2.04582	0.26		0.0351	32.7803	0.0682		0.0084	7.80813	0.0144		0.0018	1.67758	0.1714		0.0152	14.2206	0.1641		0.0204	19.0798	0.1466		0.0007	0.688113	0.0429		0.0064	5.94179	0.1062		-0.0186	-17.3735	0.0695		0.0072	6.76788	0.0785
Jerónima2	2	1	1		0.3581		0.0172	14.2084	0.0284		-0.002	-1.66408	0.2755		0.0896	74.0169	0.068		0.0183	15.1322	0.0127		-0.0053	-4.34513	0.1663		0.0143	11.8512	0.1572		0.0344	28.4005	0.1371		0.0146	12.0535	0.0369		0.007	5.78971	0.0943		-0.0662	-54.75	0.0714		0.0213	17.6094	0.0738
Jerónima2	2	1.5	1.5		0.2998		0.0218	15.2672	0.0268		0.0007	0.519386	0.2424		0.0459	32.1503	0.0566		0.011	7.70363	0.0075		0.0027	1.92377	0.1384		0.0181	12.6546	0.1253		0.021	14.7045	0.1066		0.0112	7.86417	0.0281		0.0084	5.91038	0.0504		0.0114	7.95404	0.0581		0.0099	6.90759	0.0633
Jerónima2	2	2	2		0.2758		0.0091	6.09842	0.0259		0.0001	0.038532	0.2346		0.1198	79.9159	0.0536		0.0087	5.80228	0.0062		0.0118	7.84351	0.1148		0.0019	1.28157	0.1219		0.0125	8.34952	0.1065		0.0005	0.327631	0.0251		0.0006	0.401302	0.0629		-0.0186	-12.3934	0.0543		0.0132	8.7755	0.0542
Jerónima2	2	2.5	2.5		0.2598		0.0113	8.19675	0.0313		-0.0105	-7.63005	0.2247		0.0884	64.4023	0.0503		0.007	5.07971	0.0061		-0.0011	-0.769648	0.0946		0.0077	5.60332	0.1146		0.0098	7.11545	0.0991		-0.0031	-2.25752	0.0227		0.0012	0.845515	0.0439		-0.0201	-14.6517	0.0496		0.0005	0.337639	0.0567
Jerónima2	2	3	3		0.3128		-0.0156	-15.5331	0.0377		-0.0106	-10.5734	0.2654		-0.0042	-4.17662	0.0638		-0.0014	-1.39844	0.0104		-0.002	-1.98535	0.1216		-0.0021	-2.07443	0.1385		-0.0011	-1.06548	0.1109		-0.0024	-2.42165	0.0353		-0.0026	-2.55823	0.0657		-0.0073	-7.24049	0.0638		-0.0032	-3.21574	0.0675
Jerónima2	2	3.5	3.5		0.2685		0.02	15.2412	0.0264		-0.0009	-0.717129	0.2237		0.05	38.072	0.0521		0.0061	4.63953	0.0074		-0.0009	-0.689994	0.0965		0.0097	7.42029	0.1206		0.0065	4.95343	0.1017		0.0023	1.78795	0.0246		0.0051	3.84951	0.0348		-0.0182	-13.875	0.0492		0.0054	4.08843	0.0524
Jerónima2	2	4	4		0.2713		-0.0068	-7.44229	0.0306		-0.0108	-11.9292	0.2347		0.0775	85.3956	0.0541		0.0042	4.65479	0.0073		0.0027	2.96079	0.1022		-0.0002	-0.196921	0.1338		0.0088	9.66486	0.1126		-0.0039	-4.25963	0.0223		0.0018	1.99117	0.0583		0.007	7.72319	0.0538		0.0011	1.26547	0.0484
Jerónima2	2	5	5		0.2883		0.023	19.5565	0.0265		-0.001	-0.864317	0.2615		0.0283	24.1005	0.0573		0.0076	6.43572	0.0092		0.0015	1.24832	0.117		0.0193	16.4438	0.15		0.0037	3.14745	0.1235		-0.0049	-4.13893	0.0241		0.0088	7.48366	0.0533		-0.0276	-23.4845	0.0604		0.0042	3.5754	0.051
Jerónima2	2	6	6		0.2815		0.0776	48.6275	0.0231		0.0073	4.60317	0.279		0.0832	52.1233	0.0533		0.0196	12.2952	0.0105		0.0003	0.212204	0.1171		0.0415	25.969	0.1441		0.0339	21.2214	0.112		0.0203	12.7072	0.0262		0.0128	8.00548	0.053		-0.0094	-5.86378	0.0574		0.0258	16.1637	0.0461
Jerónima2	2	0	0	655.508		0.3352				0.0238				0.2846				0.0591				0.0132				0.1801				0.1646				0.1366				0.0387				0.0243				0.0598
Jerónima2	2	0.5	0.5	934.121		0.3673				0.0262				0.2951				0.0766				0.0162				0.1866				0.1846				0.1473				0.0493				0.0876				0.0767
Jerónima2	2	1	1	826.532		0.3753				0.0264				0.3651				0.0863				0.0074				0.1806				0.1916				0.1517				0.0439				0.0281				0.0927
Jerónima2	2	1.5	1.5	699.875		0.3216				0.0275				0.2884				0.0676				0.0102				0.1565				0.1463				0.1178				0.0366				0.0618				0.0679
Jerónima2	2	2	2	666.938		0.285				0.0259				0.3544				0.0623				0.0179				0.1167				0.1345				0.1069				0.0257				0.0443				0.0674
Jerónima2	2	2.5	2.5	728.27		0.2711				0.0208				0.3132				0.0573				0.005				0.1023				0.1243				0.096				0.0239				0.0238				0.05
Jerónima2	2	3	3	998.439		0.2972				0.0271				0.2612				0.0624				0.0084				0.1195				0.1375				0.1085				0.0327				0.0584				0.0606
Jerónima2	2	3.5	3.5	761.132		0.2885				0.0254				0.2737				0.0582				0.0065				0.1062				0.1271				0.104				0.0296				0.0165				0.0545
Jerónima2	2	4	4	1102.45		0.2645				0.0198				0.3122				0.0583				0.0099				0.102				0.1425				0.1088				0.0241				0.0654				0.0549
Jerónima2	2	5	5	850.704		0.3113				0.0255				0.2898				0.0649				0.0107				0.1363				0.1537				0.1186				0.0329				0.0257				0.0646
Jerónima2	2	6	6	626.322		0.3591				0.0305				0.3623				0.0729				0.0108				0.1585				0.178				0.1323				0.039				0.0437				0.0832
Bárula2	2	0	0		0.3072		-0.0136	-9.98591	0.0193		0.0029	2.14311	0.32		0.0625	45.9681	0.0542		0.0006	0.466559	0.0152		-0.0025	-1.82847	0.1506		0.014	10.3168	0.09		-0.0009	-0.679348	0.1322		-0.0076	-5.57611	0.0163		0.0105	7.6988	0.0981		-0.055	-40.444	0.0643		-0.0036	-2.68188	0.0263
Bárula2	2	0.5	0.5		0.3106		0.0409	32.9084	0.0185		0.0138	11.0964	0.3285		0.2228	179.103	0.0595		0.0197	15.8754	0.0114		0.0156		0.1839		0.0474	38.1358	0.0983		0.0121	9.72159	0.1285		0.0156	12.5734	0.0235		0.0076	6.09885	0.1056		-0.0098	-7.86238	0.0714		0.0202	16.2405	0.0236
Bárula2	2	1	1		0.3111		-0.0048	-4.24242	0.019		0.0068	6.03922	0.3375		0.1303	114.937	0.0585		0.0049	4.2896	0.0107		0.0009	0.815721	0.1651		0.0213	18.8105	0.0856		0.0049	4.33035	0.1226		-0.0017	-1.53324	0.0336		-0.013		0.1119		-0.0728	-64.2616	0.0675		0.0069	6.1142	0.0246
Bárula2	2	1.5	1.5		0.3019		0.0056	5.10025	0.0194		0.0002	0.142397	0.3781		0.1569	141.907	0.0563		0.0068	6.15466	0.0097		-0.0025	-2.28434	0.1562		-0.0139	-12.5971	0.0824		0.0155	13.9946	0.1199		0.0045	4.07244	0.0186		0.004	3.63477	0.0544		0.0365	33.0048	0.0626		0.0053	4.82117	0.0264
Bárula2	2	2	2		0.2967		0.0298	26.258	0.0266		0.002	1.78614	0.3459		0.1472	129.598	0.0551		0.0087	7.69728	0.0103		-0.0012	-1.05787	0.163		0.0028	2.49154	0.0822		0.0085	7.46719	0.1186		0.0093	8.20442	0.0193		0.0073	6.40451	0.0786		-0.0009	-0.77576	0.0628		0.0096	8.4236	0.0265
Bárula2	2	2.5	2.5		0.2711		-0.0114	-7.08398	0.0219		-0.0051	-3.18964	0.2683		0.0703	43.6285	0.0485		-0.0022	-1.39612	0.0081		0.0158	9.80629	0.1356		-0.0048	-3.00023	0.0727		-0.0042	-2.63774	0.1083		-0.0104	-6.46439	0.0259		0.0015	0.914162	0.0695		0.0241	14.9792	0.0516		-0.0011	-0.696434	0.0251
Bárula2	2	3	3		0.2813		0.0361	29.5662	0.0247		-0.0045	-3.69687	0.3392		0.1113	91.137	0.0483		0.0157	12.8716	0.0342		-0.003	-2.48872	0.1335		0.0426	34.8997	0.0874		0.0075	6.10871	0.118		0.0094	7.659	0.0249		0.007	5.7311	0.0879		-0.0064	-5.23912	0.0533		0.0155	12.709	0.0172
Bárula2	2	3.5	3.5		0.2602		0.0392	32.4926	0.018		0.0011	0.935114	0.3081		0.0352	29.1634	0.0445		0.0166	13.7505					0.1179		0.0507	42.0047	0.0887		0.0023	1.94046	0.1145		0.0015	1.27902	0.0236		0.008	6.64798	0.0947		-0.0171	-14.1927	0.0489		0.0171	14.1593	0.0151
Bárula2	2	4	4		0.304		0.0066	5.57284	0.0194		0.0066	5.51544	0.3587		0.023	19.2761	0.0552		0.0036	3.02283	0.0148		-0.0005	-0.423299	0.1415		0.0034	2.87461	0.087		0.0006	0.485472	0.1239		-0.0056	-4.7329	0.0153		0.0154	12.9288	0.0802		-0.0229	-19.1657	0.0583		0.0031	2.62359	0.0254
Bárula2	2	5	5		0.3189		-0.0457	-34.0888	0.022		-0.0032	-2.38268	0.3478		0.1129	84.1674	0.0602		-0.0123	-9.20539	0.0181				0.1644		-0.0374	-27.8891	0.0995		-0.0021	-1.56055	0.1369		-0.0197	-14.6553	0.0276		0.001	0.713102	0.0677		0.0225	16.7548	0.0658		-0.0134	-9.99695	0.0257
Bárula2	2	6	6		0.334		0.0018	1.28444	0.012		0.0024	1.71889	0.4187		0.1108	78.9926	0.0656		0.0043	3.0633	0.0206		0.003	2.11306	0.2096		-0.0195	-13.8984	0.1091		0.0047	3.3811	0.1461		-0.0023	-1.62003	0.0194		0.0113	8.08653	0.1084		-0.0524	-37.3852	0.0708		0.0072	5.16352	0.0259
Bárula2	2	0	0	735.435		0.2936				0.0222				0.3825				0.0548				0.0127				0.1646				0.089				0.1246				0.0267				0.0431				0.0607
Bárula2	2	0.5	0.5	803.992		0.3515				0.0323				0.5513				0.0793				0.027				0.2313				0.1104				0.1441				0.0311				0.0958				0.0916
Bárula2	2	1	1	882.19		0.3063				0.0258				0.4678				0.0634				0.0117				0.1864				0.0905				0.1208				0.0206				0.0391				0.0744
Bárula2	2	1.5	1.5	904.639		0.3075				0.0196				0.535				0.0631				0.0072				0.1423				0.0978				0.1244				0.0227				0.0909				0.0679
Bárula2	2	2	2	880.265		0.3265				0.0287				0.4931				0.0639				0.0091				0.1659				0.0907				0.1279				0.0266				0.0778				0.0724
Bárula2	2	2.5	2.5	621.036		0.2597				0.0167				0.3386				0.0462				0.0239				0.1308				0.0684				0.0979				0.0274				0.0936				0.0505
Bárula2	2	3	3	818.547		0.3175				0.0202				0.4505				0.0641				0.0312				0.1761				0.0949				0.1274				0.0319				0.0815				0.0688
Bárula2	2	3.5	3.5	828.609		0.2994				0.0191				0.3433				0.0611				0.0172				0.1686				0.0911				0.1161				0.0316				0.0776				0.066
Bárula2	2	4	4	838.672		0.3106				0.026				0.3817				0.0588				0.0143				0.145				0.0876				0.1182				0.0307				0.0573				0.0614
Bárula2	2	5	5	745.546		0.2731				0.0188				0.4607				0.0479								0.127				0.0974				0.1172				0.0285				0.0902				0.0524
Bárula2	2	6	6	713.144		0.3358				0.0144				0.5295				0.0699				0.0235				0.1901				0.1139				0.1438				0.0307				0.0559				0.0781
Agapita2	2	0	0		0.255		-0.0197	-17.0663	0.0162		0.0031	2.64757	0.4168		-0.0025	-2.19871	0.0496		-0.0022	-1.90272	0.0119		-0.0004	-0.313581	0.1566		0.0007	0.596032	0.082		-0.0048	-4.1723	0.1381		-0.0177	-15.3123	0.0355		0.0012	1.03737	0.0661		-0.0433	-37.4644	0.0307		-0.0031	-2.68329	0.0363
Agapita2	2	0.5	0.5		0.318		0.0035	3.22311	0.0247		0.0093	8.6084	0.5285		-0.0343	-31.6972	0.0721		0.0086	7.94923	0.0123		0.0018	1.6589	0.2138		0.0177	16.3234	0.1055		0.007	6.42985	0.1612		-0.0012	-1.13831	0.0497		0.0096	8.87501	0.1003		-0.0346	-31.962	0.0557		0.0062	5.76501	0.0498
Agapita2	2	1	1		0.2823		0.0045	4.68589	0.0212		0.0007	0.753506	0.4726		0.0277	28.8965	0.0637		0.0056	5.80135	0.0083		0.0003	0.326755	0.1865		0.0081	8.41284	0.0916		0.0067	6.9918	0.1383		0.0003	0.276308	0.0383		0.0064	6.69421	0.072		-0.0293	-30.5848	0.0464		0.0053	5.53662	0.0386
Agapita2	2	1.5	1.5		0.2636		0.0065	7.92748	0.0251		-0.0071	-8.6025	0.4371		0.1075	130.758	0.0603		0.0076	9.25675	0.0077		-0.0032	-3.9482	0.1578		0.0118	14.3184	0.086		0.0067	8.18353	0.1296		0.0007	0.876613	0.0326		0.007	8.54828	0.0493		-0.0306	-37.2106	0.0411		0.0053	6.47533	0.0371
Agapita2	2	2	2		0.2718		-0.0191	-18.0885	0.0205		0.003	2.87365	0.4865		-0.029	-27.4457	0.0619		-0.0002	-0.169485	0.0077		0.0002	0.178887	0.156		0.0067	6.34151	0.0874		-0.0007	-0.703226	0.134		-0.0124	-11.7304	0.0328		0.0034	3.18014	0.0671		-0.0182	-17.2441	0.042		0.001	0.904818	0.037
Agapita2	2	2.5	2.5		0.2531		-0.0055	-4.70435	0.023		-0.0053	-4.50234	0.4205		0.0476	40.7546	0.0568		0.0038	3.28827	0.0076		-0.001	-0.888162	0.134		-0.0344	-29.4937	0.0814		0.0016	1.37372	0.1246		-0.0068	-5.82441	0.0299		0.0031	2.69144	0.0555		-0.025	-21.3777	0.0356		0.0036	3.05474	0.0327
Agapita2	2	3	3		0.2492		-0.0106	-9.27027	0.018		0.0064	5.54365	0.4628		-0.0384	-33.4988	0.0533		0.0005	0.434445	0.0075		-0.0016	-1.41324	0.1364		-0.0008	-0.729536	0.0796		-0.002	-1.74253	0.1225		-0.0086	-7.54099	0.0291		0.0049	4.29464	0.0615		-0.0412	-35.985	0.0326		0.0001	0.0639494	0.0315
Agapita2	2	3.5	3.5		0.2644		-0.0086	-7.70324	0.0243		-0.0022	-1.94247	0.4571		0.0152	13.6281	0.0607		0.003	2.65181	0.0115		-0.0018	-1.64123	0.142		0.005	4.47297	0.089		0.0043	3.87361	0.1342		-0.0096	-8.5865	0.0314		0.0021	1.91377	0.0619		-0.0305	-27.3203	0.0375		0.0041	3.69627	0.0304
Agapita2	2	4	4		0.2797		0.005	4.66178	0.0262		0.0011	1.07537	0.4612		0.1443	135.294	0.0661		0.0051	4.8182	0.014		-0.0001	-0.130246	0.1702		0.0039	3.69404	0.1		0.0047	4.36052	0.1435		-0.0025	-2.33598	0.0364		0.0043	4.07368	0.0556		-0.003	-2.82535	0.0445		0.008	7.50208	0.0355
Agapita2	2	5	5		0.2544		-0.0066	-6.73842	0.0242		-0.0055	-5.61719	0.3887		0.2092	212.776	0.0572		0.0016	1.67018	0.0141		-0.0049	-5.02807	0.1404		0.0086	8.70544	0.0874		0.0005	0.47922	0.1286		-0.0081	-8.25749	0.0316		0.0008	0.819044	0.0349		-0.015	-15.2795	0.0365		0.0022	2.27769	0.0317
Agapita2	2	6	6		0.2786		0.0031	3.07251	0.0224		0.0026	2.57523	0.4708		-0.0387	-38.6317	0.0632		0.0003	0.276136	0.0177		-0.0003	-0.259779	0.1607		0.0134	13.4273	0.1018		-0.0016	-1.60051	0.146		-0.0013	-1.30563	0.0355		0.002	2.01245	0.0413		0.0018	1.82111	0.0456		0	0.0381292	0.0345
Agapita2	2	0	0	864.839		0.2353				0.0193				0.4143				0.0474				0.0115				0.1573				0.0772				0.1204				0.0367				0.0228				0.0276
Agapita2	2	0.5	0.5	924.487		0.3214				0.034				0.4942				0.0807				0.0141				0.2315				0.1124				0.16				0.0593				0.0657				0.0619
Agapita2	2	1	1	1044.63		0.2868				0.0219				0.5002				0.0692				0.0086				0.1945				0.0983				0.1386				0.0447				0.0427				0.0517
Agapita2	2	1.5	1.5	1216.86		0.2701				0.0181				0.5446				0.068				0.0044				0.1695				0.0927				0.1304				0.0396				0.0187				0.0464
Agapita2	2	2	2	947.94		0.2527				0.0236				0.4575				0.0617				0.0079				0.1627				0.0867				0.1216				0.0362				0.0489				0.0429
Agapita2	2	2.5	2.5	856.173		0.2476				0.0178				0.4681				0.0606				0.0066				0.0995				0.083				0.1178				0.0331				0.0305				0.0392
Agapita2	2	3	3	872.614		0.2386				0.0244				0.4244				0.0538				0.0059				0.1356				0.0776				0.1138				0.034				0.0202				0.0327
Agapita2	2	3.5	3.5	894.536		0.2558				0.0221				0.4723				0.0637				0.0096				0.147				0.0934				0.1246				0.0335				0.0313				0.0416
Agapita2	2	4	4	937.289		0.2846				0.0274				0.6056				0.0713				0.0138				0.1741				0.1046				0.141				0.0407				0.0525				0.0525
Agapita2	2	5	5	1016.96		0.2477				0.0187				0.5979				0.0588				0.0091				0.149				0.0878				0.1204				0.0324				0.0198				0.0387
Agapita2	2	6	6	998.997		0.2817				0.025				0.4321				0.0634				0.0174				0.1741				0.1002				0.1447				0.0375				0.0431				0.0456
[truncated: 63 more columns]
